# Supplementary material
Source: PubMed Central journal article supplement (PMC8501228)
Supplement: mmc1.pdf [file mmc1.pdf]

**Supplemental information**

**Mechanistic insights into COVID-19**

**by global analysis**

**of the SARS-CoV-2 3CL<sup>pro</sup> substrate degradome**

**Isabel Pablos, Yoan Machado, Hugo C. Ramos de Jesus, Yasir Mohamud, Reinhild Kappelhoff, Cecilia Lindskog, Marli Vlok, Peter A. Bell, Georgina S. Butler, Peter M. Grin, Quynh T. Cao, Jenny P. Nguyen, Nestor Solis, Srinivas Abbina, Wioletta Rut, John C. Vederas, Laszlo Szekely, Attila Szakos, Marcin Drag, Jayachandran N. Kizhakkedathu, Karen Mossman, Jeremy A. Hirota, Eric Jan, Honglin Luo, Arinjay Banerjee, and Christopher M. Overall**

**Table S1 related to Figures 1 and 6, and Table 1. Candidate 3CL<sup>pro</sup> substrates (n = 58) and their cleavage sites (n = 65) detected in human embryonic kidney (HEK-293) and human lung epithelial (BEAS-2B) cells that require further validation.**

| Gene Name | UniProt | TAILS neo-N-Terminal P' Peptide                                       | Byonic Score | P4 – P4 <sup>1*</sup>      | HEK-293 | BEAS-2B |               |              |
|-----------|---------|-----------------------------------------------------------------------|--------------|----------------------------|---------|---------|---------------|--------------|
|           |         |                                                                       |              |                            |         | Control | IFN- $\alpha$ | IFN- $\beta$ |
| PAIRB†    | SERBP1  | AAAQNSNAAGKQLR                                                        | 809          | SAAQ↓ <sup>57</sup> AAAQ   | ●●●     | ●●●     | ●●●           | ●●●          |
| PAIRB†    | SERBP1  | GEGKIIDR                                                              | 549          | QQLQ↓ <sup>119</sup> GEGK  | ●●●     | ●●●     | ●●●           | ●●●          |
| K2C8      | KRT8    | AEIEGLKGQR                                                            | 644          | SRLQ↓ <sup>319</sup> AEIE  | ●●●     | ●●●     | ●●●           | ●●●          |
| PTBP1     | PTBP1   | GALAPLAIPSAAAAAAAGR                                                   | 641          | PNVH↓ <sup>306</sup> GALA  | ●●●     | ●●●     | ●●●           | ●●●          |
| PININ†    | PNN     | SQPPSQPEDLSLAVLQPTPQVTQEQQHLLPER                                      | 615          | PVLQ↓ <sup>496</sup> SQPP  | ●●●     | ●●●     | ●●●           | ●●●          |
| PININ†    | PNN     | SQSQPVLSQPPSQPEDLSLAVLQPTPQVTQEQQHLLPER                               | 571          | LQLQ↓ <sup>488</sup> SQSQ  | ●●●     | ●●●     | ●●●           | ●●●          |
| CHSP1     | CARHSP1 | ASVGLLDTPR                                                            | 503          | PTHQ↓ <sup>16</sup> ASVG   | ●●●     | ●●●     | ●●●           | ●●●          |
| ATLA2     | ATL2    | ATAEANNLAAVAGAR                                                       | 502          | SMLQ↓ <sup>377</sup> ATAE  | ●●●     | ●●●     | ●●●           | ●●●          |
| LMNA      | LMNA    | ASSTPLSPTR                                                            | 463          | SGAQ↓ <sup>16</sup> ASST   | ●●●     | ●●●     | ●●●           | ●●●          |
| ALDOA     | ALDOA   | SIGTENTEENRR                                                          | 456          | KRLQ↓ <sup>46</sup> SIGT   | ●●●     | ●●●     | ●●●           | ●●●          |
| STMN1     | STMN1   | AFELILSPR                                                             | 440          | ASGQ↓ <sup>19</sup> AFEL   | ●●●     | ●●●     | ●●●           | ●●●          |
| HSP7C     | HSPA8   | HGKVEIANDQGNR                                                         | 541          | GVFQ↓ <sup>23</sup> HGKV   | ●●●     | ●●●     | ●●●           | ●●●          |
| TCPZ      | CCT6A   | AALAVNISAAR                                                           | 521          | ARAQ↓ <sup>18</sup> AALA   | ●●●     | ●●●     | ●●●           | ●●●          |
| FUS       | FUS     | SYNPPQGYGQQNQYNSSSGGGGGGGGGNYGQDQSSMSSGG<br>GSGGGYGNQDQSGGGGGGGYGGQQR | 265          | GQQQ↓ <sup>148</sup> SYNP  | ●●●     | ●●●     | ●●●           | ●●●          |
| ZC3H13    | ZC3H14  | SSWVYETGR                                                             | 271          | LDMQ↓ <sup>251</sup> SSWV  | ●●      | ●●      | ●●●           | ●●●          |
| PRP4B     | PRPF4B  | GYESGSEEEGEIHEKAR                                                     | 593          | LILQ↓ <sup>139</sup> GYES  | ●●●     | ●●●     | ●●●           | ●●●          |
| HNRPD     | HNRNPD  | GAAAAAGSGAGTGGGTASGGTEGGSASEGAKIDASKNEEDEG<br>HSNSSPR                 | 478          | AATQ↓ <sup>36</sup> GAAA   | ●●●     | ●●●     | ●●●           | ●●●          |
| ZFR       | ZFR     | SDVQPVGHDYVEEVRNDEGKIVR                                               | 469          | AALQ↓ <sup>559</sup> SDVQ  | ●●●     | ●●●     | ●●●           | ●●●          |
| SFPQ      | SFPQ    | HHQGGPPPGGPGGR                                                        | 436          | YHQQ↓ <sup>255</sup> HHQG  | ●●●     | ●●●     | ●●●           | ●●●          |
| GRAP1     | GRIPAP1 | AENTALQKNVAALQER                                                      | 426          | LRLQ↓ <sup>142</sup> AENT  | ●●●     | ●●●     | ●●●           | ●●●          |
| CSTF2†    | CSTF2   | ASMQGGVPAPGQMPAAVTGPGPGSLAPGGGMQAQVGMPSGSP<br>VSMER                   | 414          | PLMQ↓ <sup>248</sup> ASMQ  | ●●●     | ●●●     | ●●●           | ●●●          |
| CSTF2†    | CSTF2   | VGMPGSGPVSMER                                                         | 342          | MQAQ↓ <sup>282</sup> VGMP  | ●●●     | ●●●     | ●●●           | ●●●          |
| RBP56†    | TAF15   | SQSGYSQSYGGYENQKQSSYSQQPYNNQGGQQNMESSGSQGG                            | 412          | SYGQ↓ <sup>59</sup> SQSG   | ●●●     | ●●●     | ●●●           | ●●●          |
| RBP56†    | TAF15   | SGYSQSYGGYENQKQSSYSQQPYNNQGGQQNMESSGSQGG                              | 390          | GQSQ↓ <sup>61</sup> SGYS   | ●●●     | ●●●     | ●●●           | ●●●          |
| ATX2      | ATXN2   | AGIIPTEAVAMPIAASPTPASPASNR                                            | 386          | ASPQ↓ <sup>712</sup> AGII  | ●●●     | ●●●     | ●●●           | ●●●          |
| DAXX      | DAXX    | GTSSHSADTPEASLDSEGGPSGGMASQGCPSASR                                    | 369          | ARLQ↓ <sup>400</sup> GTSS  | ●●●     | ●●●     | ●●●           | ●●●          |
| PRRC1     | PRRC1   | GTGTTSAITFPPEEQEDPR                                                   | 338          | SLAQ↓ <sup>183</sup> GTGT  | ●●●     | ●●●     | ●●●           | ●●●          |
| EPIPL     | EPPK1   | TSGILGPETLR                                                           | 338          | SELH↓ <sup>2724</sup> TSGI | ●●●     | ●●●     | ●●●           | ●●●          |
| TOX4      | TOX4    | AAAAAAAASMLPPPR                                                       | 334          | SVLQ↓ <sup>426</sup> AAAA  | ●●●     | ●●●     | ●●●           | ●●●          |
| EWS       | EWSR1   | SSSYGQSSFR                                                            | 309          | YSQ↓ <sup>258</sup> SSSY   | ●●●     | ●●●     | ●●●           | ●●●          |
| AKP8L     | AKAP8L  | STYSDTSAQPTCDYGYGTWNSGTNR                                             | 308          | TTLQ↓ <sup>18</sup> STYS   | ●●●     | ●●●     | ●●●           | ●●●          |
| IF4G1†    | EIF4G1  | GAYYPGQGR                                                             | 304          | PASQ↓ <sup>101</sup> GAYY  | ●●●     | ●●●     | ●●●           | ●●●          |
| IF4G1†    | EIF4G1  | MSVEESTPISR                                                           | 322          | TTIQ↓ <sup>295</sup> MSVE  | ●●●     | ●●●     | ●●●           | ●●●          |
| IF4G1†    | EIF4G1  | QAVPTESTDNRR                                                          | 263          | SALQ↓ <sup>1126</sup> QAVP | ●●●     | ●●●     | ●●●           | ●●●          |
| ARPIN     | ARPIN   | SSYKVEAKGDTDR                                                         | 286          | GFLM↓ <sup>98</sup> SSYK   | ●●●     | ●●●     | ●●●           | ●●●          |
| FLNA      | FLNA    | SGTTNKPNKFTVETR                                                       | 273          | PGIQ↓ <sup>1367</sup> SGTT | ●●●     | ●●●     | ●●●           | ●●●          |
| ENOA      | ENO1    | VVGDDLTVTNPKR                                                         | 273          | AGIQ↓ <sup>315</sup> VVGD  | ●●●     | ●●●     | ●●●           | ●●●          |
| SF3B2     | SF3B2   | GVEVALAPELELDPMAMTKYEEHVR                                             | 268          | PELQ↓ <sup>623</sup> GVEV  | ●●●     | ●●●     | ●●●           | ●●●          |
| GOGA3     | GOLGA3  | AQVECSHSSQQR                                                          | 256          | TKLQ↓ <sup>451</sup> AQVE  | ●●●     | ●●●     | ●●●           | ●●●          |
| TAB1      | TAB1    | SEQQPSWTDLPLCHLSGVGSASNR                                              | 240          | SLLQ↓ <sup>11</sup> SEQQ   | ●●●     | ●●●     | ●●●           | ●●●          |
| SETD2     | SETD2   | AAPVPLPVDVAVR                                                         | 237          | TVLM↓ <sup>224</sup> AAPV  | ●●●     | ●●●     | ●●●           | ●●●          |
| TMED8     | TMED8   | SEHTGAIDVLSADLESADLLGDHR                                              | 203          | VMIQ↓ <sup>127</sup> SEHT  | ●●●     | ●●●     | ●●●           | ●●●          |
| ROCK2     | ROCK2   | ALHIGLDSSSIGSGPGDAEADDFPESR                                           | 406          | SQLQ↓ <sup>1125</sup> ALHI | ●●      | ●●      | ●●●           | ●●●          |
| CNN3      | CNN3    | MGTNKGASQAGMLAPGTR                                                    | 386          | ISLQ↓ <sup>208</sup> MGTN  | ●●      | ●●      | ●●●           | ●●●          |
| PUR9†     | ATIC    | SSESKDTSLETR                                                          | 357          | TEMQ↓ <sup>160</sup> SSES  | ●●      | ●●      | ●●●           | ●●●          |
| PUR9†     | ATIC    | MDQSYKPDENEVR                                                         | 272          | CVLQ↓ <sup>367</sup> MDQS  | ●●      | ●●      | ●●●           | ●●●          |
| PTBP3     | PTBP3   | SGSLALSGPSNEGTVLPQSPVLR                                               | 353          | SAVQ↓ <sup>159</sup> SGSL  | ●●      | ●●      | ●●●           | ●●●          |
| NEB2      | PPP1R9B | MGTTAGPSGEAGGGAGLAEAPR                                                | 312          | MFLQ↓ <sup>64</sup> MGTT   | ●●      | ●●      | ●●●           | ●●●          |
| ZKSC8     | ZKSCAN8 | SEATQHKSPVPQESQER                                                     | 234          | TQLQ↓ <sup>170</sup> SEAT  | ●●      | ●●      | ●●●           | ●●●          |
| PRUN2     | PRUNE2  | GTQLASFDPDTCQPASLNER                                                  | 378          | TGLQ↓ <sup>2588</sup> GTQL | ●●      | ●●      | ●●●           | ●●●          |
| TRIR      | TRIR    | GREAPGAGGGGGGSR                                                       | 350          | AEPQ↓ <sup>12</sup> GREA   | ●●      | ●●      | ●●●           | ●●●          |
| ANLN      | ANLN    | AADTISDSVAVPASLLGMR                                                   | 311          | VQPQ↓ <sup>109</sup> AADT  | ●●      | ●●      | ●●●           | ●●●          |
| ELYS      | AHCTF1  | AEFDMSAIPR                                                            | 238          | LTVQ↓ <sup>1963</sup> AEFD | ●●      | ●●      | ●●●           | ●●●          |
| RABE1     | RABEP1  | SREQVSEELVR                                                           | 342          | VLMQ↓ <sup>634</sup> SREQ  | ●●      | ●●      | ●●●           | ●●●          |
| FA98A     | FAM98A  | TSSSYTGSGYQGGGYQQDNR                                                  | 326          | GGFQ↓ <sup>428</sup> TSSS  | ●●      | ●●      | ●●●           | ●●●          |
| VATH      | ATP6V1H | GQMISAEDCEFIQR                                                        | 259          | SYLQ↓ <sup>39</sup> GQMI   | ●●      | ●●      | ●●●           | ●●●          |
| GGB1      | GOLGB1  | LSQTQAEQAQQVVR                                                        | 237          | LQAQ↓ <sup>206</sup> LSQT  | ●●      | ●●      | ●●●           | ●●●          |
| DLGP4     | DLGAP4  | SIGVQVEDDWR                                                           | 231          | TKFQ↓ <sup>690</sup> SIGV  | ●●      | ●●      | ●●●           | ●●●          |
| DREB      | DBN1    | AWAGPMEEPPQAQAPPR                                                     | 431          | AAPQ↓ <sup>396</sup> AWAG  | ●●      | ●●      | ●●●           | ●●●          |

|       |         |                    |     |                            |     |     |     |     |
|-------|---------|--------------------|-----|----------------------------|-----|-----|-----|-----|
| DEN5B | DENND5B | SDVLATGPTSNNR      | 294 | PKLQ↓ <sup>660</sup> SDVL  | 000 | ●●● | ●●● | ●   |
| SRRM2 | SRRM2   | SGSDSSPEPKAPAPR    | 222 | PRAQ↓ <sup>1616</sup> SGSD | 000 | ●●  | ●●● | ●●● |
| LRRF1 | LRRFIP1 | SREIDCLSPEAQKLAEAR | 267 | AAAQ↓ <sup>9</sup> SREI    | 000 | ●●● | ●●● | ●●  |
| SPT6H | SUPT6H  | SAQAQPQSSSSR       | 357 | TTPQ↓ <sup>1646</sup> SAQA | 000 | ●   | ●●  | ●●  |
| K1C18 | KRT18   | SVENDIHGLR         | 341 | AMRQ↓ <sup>177</sup> SVEN  | 000 | ●   | 000 | ●●● |
| LRC59 | LRRC59  | HMKAVQADQER        | 243 | KVLQ↓ <sup>147</sup> HMKA  | 000 | 000 | 000 | ●●● |

Candidate substrates are those that did not meet high stringency manual inspection of the MS/MS spectra of the filtered neo-N-terminal P' peptides. Fields marked as "●" or "●" indicate in which of the  $N = 12$  independent cell experiments the neo-N-terminal P' peptide was found by TAILS LC-MS/MS with an  $FDR \leq 0.01$  at the peptide level. \*, Amino acid sequence of the cleavage site and P1' amino acid position identified from the neo-N-terminal peptide. ↓, scissile bond. †, Proteins with multiple cut sites are shown with each other according to the highest-ranked peptide.

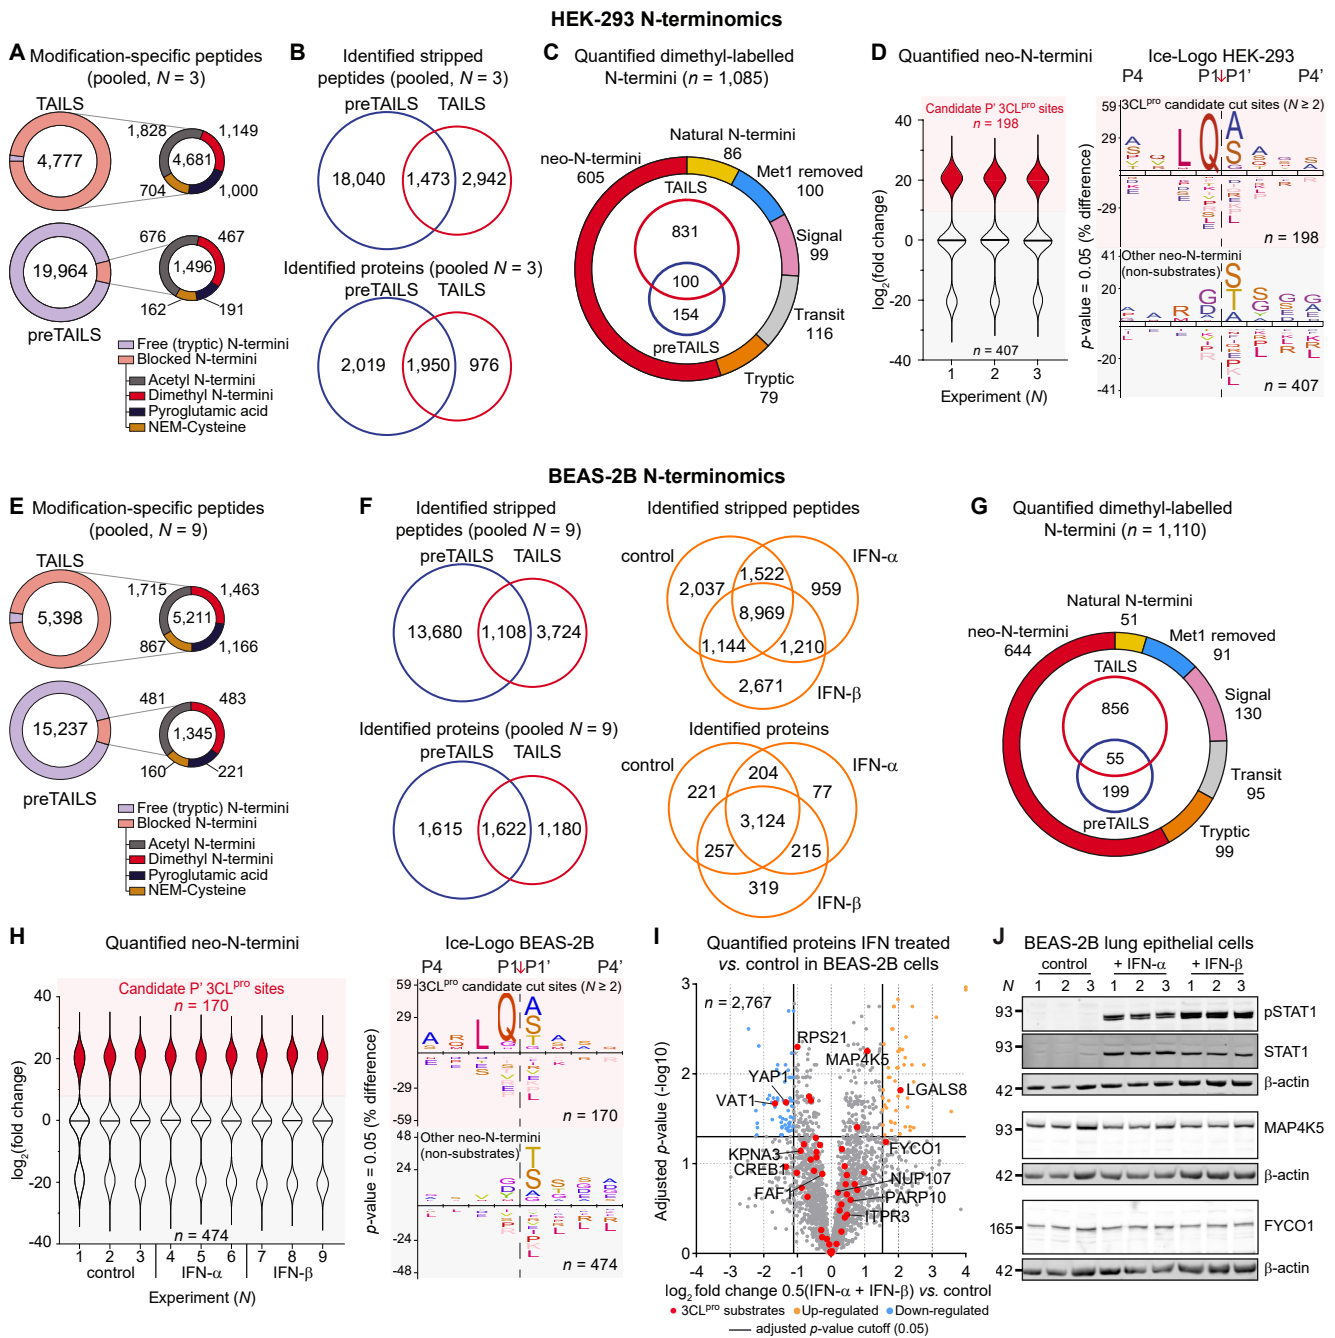

**Figure S1 related to Figure 1. Quantitative TAILS and shotgun proteomics of HEK-293 and BEAS-2B cells.**

- (A) Distribution of free and N-terminal-modified peptides identified by TAILS and PreTAILS in  $N = 3$  independent HEK-293 cell experiments.
- (B) Venn diagrams of the total numbers of peptides and proteins identified,  $FDR \leq 0.01$ .
- (C) Classification of 1,085 quantified isotope-labelled, dimethylated N-termini by TopFinder 4.1 ( $N = 3$ ).
- (D)  $\text{Log}_2(\text{fold change})$  distribution of all quantified neo-N-termini ( $n = 605$ ) used to calculate the native protein P4–P4' cleavage site specificity of 3CL<sup>pro</sup> ( $n = 198$ ) *versus* other cell protease activity before cell harvesting and addition of protease inhibitors ( $n = 407$ ).
- (E) Distribution of free and N-terminal-modified peptides identified by TAILS and PreTAILS in  $N = 9$  independent BEAS-2B cell experiments.
- (F) Venn diagrams of the total numbers of peptides and proteins identified (left), and after 24-h treatment by IFN- $\alpha$  ( $N = 3$ ), IFN- $\beta$  ( $N = 3$ ), and vehicle ( $N = 3$ ),  $FDR \leq 0.01$ .
- (G) Classification of 1,110 quantified isotope-labelled, dimethylated N-termini by TopFinder 4.1 ( $N = 9$ ).
- (H)  $\text{Log}_2(\text{fold change})$  distribution of quantified neo-N-termini ( $n = 644$ ) used to calculate the native protein P4–P4' cleavage site specificity of 3CL<sup>pro</sup> ( $n = 170$ ) *versus* other cell protease activity before cell harvesting and addition of protease inhibitors ( $n = 474$ ).
- (I) Volcano plot of  $\text{log}_2$ -fold change in expression of 2,767 proteins quantified in type I interferon-treated BEAS-2B cells ( $N = 6$ ) relative to controls ( $N = 3$ ). Red-filled circles, 3CL<sup>pro</sup> substrates ( $n = 45$ ). Yellow and blue-filled circles, IRG proteins with increased ( $n = 49$ ) or decreased ( $n = 64$ ) expression, respectively. A multiple sample t-test assessed statistical significance with Benjamini Hochberg correction. To focus on the 3CL<sup>pro</sup> substrates, 113 IRG proteins with an adjusted  $p$ -value  $> 0.05$  and  $\text{log}_2$ -fold change in expression  $\geq 1.53$  or  $\leq -1.11$  are not plotted and are listed in table S6.
- (J) Immunoblot analysis of elevated phospho-STAT1-Tyr<sup>701</sup> protein, and unaltered FYCO1 and MAP4K5 protein levels in response to type I interferon signalling. b-actin loading controls. Protein levels of FYCO1 showed no apparent change, and although exhibiting a large relative fold-change at the peptide level by LC-MS/MS, this was not statistically significant. MAP4K5 peptides exhibited a small fold-change upon interferon treatment by LC-MS/MS that was significant. However, this small change was not readily apparent by immunoblotting and is unlikely to be biologically significant.

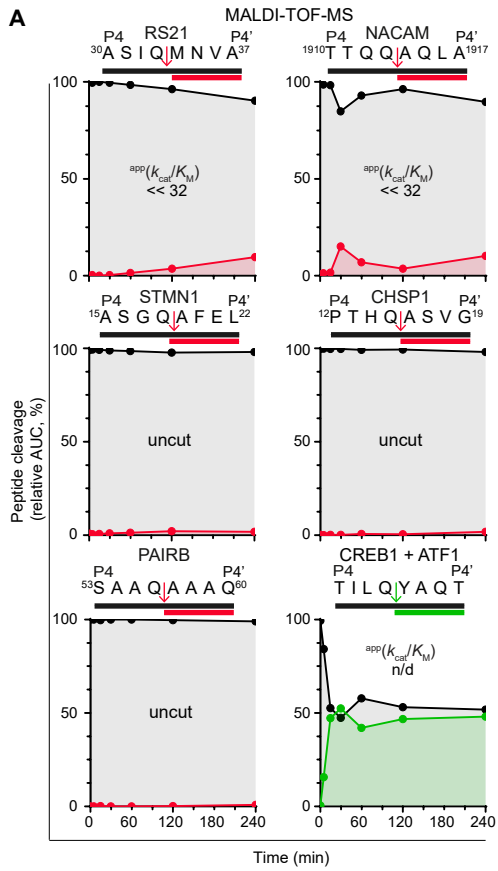

**B** Nuclear localization signal

|         |            |           |       |        |                |        |          |             |            |       |     |
|---------|------------|-----------|-------|--------|----------------|--------|----------|-------------|------------|-------|-----|
| PTBP1-1 | MDGIVPDIAG | GTRKGSDEL | FSTCV | TNGP   | PFIMSSNSASAANG | NDSSK  | KFKG     | DSRSAGVPSRV | 60         |       |     |
| PTBP1-2 | MDGIVPDIAG | GTRKGSDEL | FSTCV | TNGP   | PFIMSSNSASAANG | NDSSK  | KFKG     | DSRSAGVPSRV | 60         |       |     |
| PTBP1-3 | MDGIVPDIAG | GTRKGSDEL | FSTCV | TNGP   | PFIMSSNSASAANG | NDSSK  | KFKG     | DSRSAGVPSRV | 60         |       |     |
| *****   |            |           |       |        |                |        |          |             |            |       |     |
| PTBP1-1 | IHIRKLP    | IDVTEGEV  | ISLGL | PFPGKV | TNLLML         | KGKQAF | IEMNTEEA | ANTMVNYT    | SVTPV      | 120   |     |
| PTBP1-2 | IHIRKLP    | IDVTEGEV  | ISLGL | PFPGKV | TNLLML         | KGKQAF | IEMNTEEA | ANTMVNYT    | SVTPV      | 120   |     |
| PTBP1-3 | IHIRKLP    | IDVTEGEV  | ISLGL | PFPGKV | TNLLML         | KGKQAF | IEMNTEEA | ANTMVNYT    | SVTPV      | 120   |     |
| *****   |            |           |       |        |                |        |          |             |            |       |     |
| PTBP1-1 | LRGQPI     | YIQFSNHK  | ELKTD | SSPNQ  | ARAQAALQ       | AVNSV  | QSGNLA   | LAASAAA     | VDAGMAMAGQ | 180   |     |
| PTBP1-2 | LRGQPI     | YIQFSNHK  | ELKTD | SSPNQ  | ARAQAALQ       | AVNSV  | QSGNLA   | LAASAAA     | VDAGMAMAGQ | 180   |     |
| PTBP1-3 | LRGQPI     | YIQFSNHK  | ELKTD | SSPNQ  | ARAQAALQ       | AVNSV  | QSGNLA   | LAASAAA     | VDAGMAMAGQ | 180   |     |
| *****   |            |           |       |        |                |        |          |             |            |       |     |
| PTBP1-1 | SPVLR      | IIVENLFY  | PVTL  | DVLH   | QIFSK          | FGTVL  | KIIT     | FTKNNQ      | FQALLQYAD  | PVSAQ | 240 |
| PTBP1-2 | SPVLR      | IIVENLFY  | PVTL  | DVLH   | QIFSK          | FGTVL  | KIIT     | FTKNNQ      | FQALLQYAD  | PVSAQ | 240 |
| PTBP1-3 | SPVLR      | IIVENLFY  | PVTL  | DVLH   | QIFSK          | FGTVL  | KIIT     | FTKNNQ      | FQALLQYAD  | PVSAQ | 240 |
| *****   |            |           |       |        |                |        |          |             |            |       |     |
| PTBP1-1 | LDGQNI     | YNACCT    | LRID  | FSK    | ITSL           | NVKYN  | DKSRDY   | TRPDL       | PSGDSQ     | PSLDQ | 297 |
| PTBP1-2 | LDGQNI     | YNACCT    | LRID  | FSK    | ITSL           | NVKYN  | DKSRDY   | TRPDL       | PSGDSQ     | PSLDQ | 298 |
| PTBP1-3 | LDGQNI     | YNACCT    | LRID  | FSK    | ITSL           | NVKYN  | DKSRDY   | TRPDL       | PSGDSQ     | PSLDQ | 300 |
| *****   |            |           |       |        |                |        |          |             |            |       |     |
| PTBP1-1 | -----      | GLSV      | PNVHG | ALAP   | LAIP           | SA     | AAAAA    | AGRI        | AI         | PGL   | 334 |
| PTBP1-2 | ----       | SPY       | AG    | AGFP   | PTFA           | ALPQ   | AGL      | SV          | PNVHG      | ALAP  | 353 |
| PTBP1-3 | GI         | IS        | AS    | PY     | AG             | AGFP   | PTFA     | ALPQ        | AGL        | SV    | 360 |
| *****   |            |           |       |        |                |        |          |             |            |       |     |
| PTBP1-1 | GN         | S         | VLLV  | SNL    | N              | PER    | VT       | P           | Q          | S     | 394 |
| PTBP1-2 | GN         | S         | VLLV  | SNL    | N              | PER    | VT       | P           | Q          | S     | 413 |
| PTBP1-3 | GN         | S         | VLLV  | SNL    | N              | PER    | VT       | P           | Q          | S     | 420 |
| *****   |            |           |       |        |                |        |          |             |            |       |     |
| PTBP1-1 | NGH        | KLHG      | KPI   | RIT    | LSKH           | Q      | N        | V           | Q          | L     | 454 |
| PTBP1-2 | NGH        | KLHG      | KPI   | RIT    | LSKH           | Q      | N        | V           | Q          | L     | 473 |
| PTBP1-3 | NGH        | KLHG      | KPI   | RIT    | LSKH           | Q      | N        | V           | Q          | L     | 480 |
| *****   |            |           |       |        |                |        |          |             |            |       |     |
| PTBP1-1 | TL         | HLS       | NI    | PP     | S              | VEE    | D        | L           | K          | V     | 514 |
| PTBP1-2 | TL         | HLS       | NI    | PP     | S              | VEE    | D        | L           | K          | V     | 533 |
| PTBP1-3 | TL         | HLS       | NI    | PP     | S              | VEE    | D        | L           | K          | V     | 540 |
| *****   |            |           |       |        |                |        |          |             |            |       |     |
| PTBP1-1 | DL         | GEN       | H     | L      | R              | V      | S        | F           | S          | K     | 531 |
| PTBP1-2 | DL         | GEN       | H     | L      | R              | V      | S        | F           | S          | K     | 550 |
| PTBP1-3 | DL         | GEN       | H     | L      | R              | V      | S        | F           | S          | K     | 557 |
| *****   |            |           |       |        |                |        |          |             |            |       |     |

3CL<sup>pro</sup> cleavage site identified by TAILS  
 3CL<sup>pro</sup> cleavage site identified by Edman sequencing

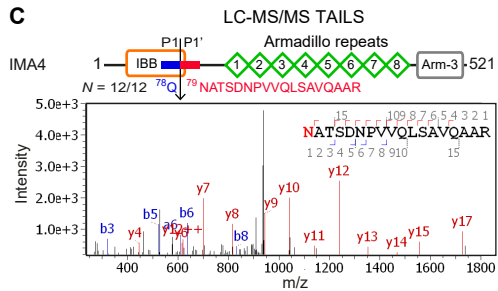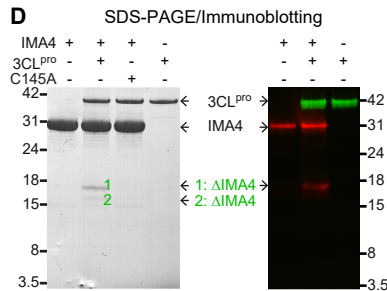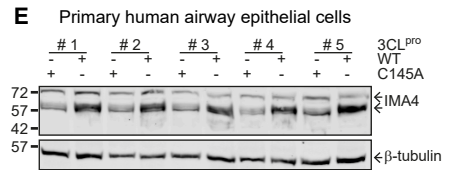

**Figure S2 related to Figures 2, 3 and 4. 3CL<sup>pro</sup> substrate validation by peptide and protein cleavage assays.**

(A) MALDI-TOF-MS analyses of peptides assay incubated with 3CL<sup>pro</sup> (1:20 molar ratio, E:S). Peptides from STMN1, CHSP1 and PAIRB, were not cut; thus, they were not included in our final substrate list (Table 1). The CREB1 cleavage site (TILQ<sup>223</sup>↓YAQT) was identified by Edman sequencing of recombinant human CREB1 cleavage products (Figure 4A) and is identical in ATF1. Product generation (red, site identified by TAILS; green, site identified by Edman sequencing) and substrate consumption (black) were calculated as the peak area normalized to the total peak area in the spectrum.

(B) PTBP1 isoforms 1, 2 and 3 sequence alignments by Clustal Omega. P and P' sites identified by TAILS (AALQ<sup>152</sup>↓AVNS) and Edman sequencing (AIPQ<sup>322</sup>↓AAGL, isoform-3 numbering), blue/red and blue/green, respectively.

(C) Relative location of the 3CL<sup>pro</sup> cleavage site in the importin beta binding domain (IBB) of IMA4 identified by the TAILS neo-N-terminal peptide (red). Representative MS/MS spectrum of neo-N-terminal peptides identifying the IMA4-cleavage site in every TAILS experiment ( $N = 12/12$ ).

(D) Validation of 3CL<sup>pro</sup> cleavage of recombinant human IMA4 by SDS-PAGE and immunoblotting for IMA4 and 3CL<sup>pro</sup> (mouse anti-FLAG antibody). IMA4 was incubated (1:5 mol/mol, E:S) with 3CL<sup>pro</sup> or inactive 3CL<sup>pro</sup>-C145A, 18 h.  $\Delta$ IMA4, no sequence of cleavage product was obtained. Figure S3C, Edman sequence data for IMA4 cleavage products 1 and 2.

(E) IMA4 immunoblot of cell lysates from HAEC from five donors. Lysates were incubated with 3CL<sup>pro</sup> or 3CL<sup>pro</sup>-C145A (1:200 w/w, E:S) for 18 h, 37°C.  $\beta$ -tubulin, loading control.

**A RPAP1**

10 20 30 40 50 60  
 GSSHHHHH LSRPKPGESE VDL<sup>↓</sup>LHFQSOE L AAGAAPAVQ LVKKGNRGG DANSDRPPQ

70 80 90 100 110 120  
 DHRDVVMLDN LPDLPALVLP SPPKRARSP GHCLPEDEDP EERLRHQH ITAVLTKIE

130 140 150 160 170 180  
 RDTSSVAVNL PVPVSGVAFPA VFLRSRDTQG KSATSGKRSI FAQEIAARRI AEAKGSPVGE

190 200 210 220 230 240  
 VVPVNGPPEG AVTCTETTPFR NQGQCLPFGSS HSFQGPNIQV GKGLRDQEA QEAQTIIHEN

250 260 270 280 290 300  
 IARLQ<sup>↓</sup>MAPE EILQEQQRLL AOLDPSLVAF LRSHTHQEQ TGETASEPQR FGGPSANVTK

310 320 330 340 350 360  
 EEPLMSAFAS EPRKRDKLEP EAPALALPVT PQKEWLHMDT VELEKLHWQ DLPPVRRQQT

**B PTBP1-3**

10 20 30 40 50 60  
 HHHHHHMDGI VPDIAV<sup>↓</sup>GTRK GSEDLFSTCV TNGPFIMSSN SASAANGNDS KFKGDSR5A

70 80 90 100 110 120  
 GVPSRV<sup>↓</sup>HIR KLPIDVTEGE VISLGLPFGK VTNLLMLKGG NQAFIEMNTE EAANTMVNYR

130 140 150 160 170 180  
 TSVTPVLRQO PIYIQF<sup>↓</sup>SNHK ELKTDSSPNQ ARAQAA<sup>↓</sup>LQAV NSVQSGNLAL AASAAAVDAG

190 200 210 220 230 240  
 MAMAGQSPVL RIIVENL<sup>↓</sup>FYP VTL<sup>↓</sup>DVLHQIF SKFGTVLKI<sup>↓</sup>I TPTKNNQFQA LLOYADPVSA

250 260 270 280 290 300  
 QHAKLSLDGQ NIYNACCL<sup>↓</sup>LR IDF<sup>↓</sup>SKLTSLN VKYNNDKSRD YTRPDLPSGD SQPSLDQ<sup>↓</sup>TMA

310 320 330 340 350 360  
 AAFGAPGIIS ASFYAGAGFP PTF<sup>↓</sup>FAIQAG LSVPNVHGAL APLAIPSA<sup>↓</sup>AAAAAGRIAI

370 380 390 400 410 420  
 PGLAGAGNSV LLVSNL<sup>↓</sup>PER VTPQSLF<sup>↓</sup>IFL GYGVQVQRVK ILFNKKNAL VQADGNQAG

430 440 450 460 470 480  
 LAMSHLNGHK LHGKPIR<sup>↓</sup>ITL SKHQNVQLPR EGQEDQGLTK DYGN<sup>↓</sup>SPLHRF KKPGSKNFON

490 500 510 520 530 540  
 IFPPSA<sup>↓</sup>TLHL SNIPPSV<sup>↓</sup>SEE DLKVL<sup>↓</sup>FSSNG GVVKGK<sup>↓</sup>FQO KDRKMALIQ GSVEEAVQAL

550 560  
 IDLH<sup>↓</sup>NHDLGE NHHLRVSP<sup>↓</sup>SK STI

**C IMA4**

10 20 30 40 50 60  
 GSSHHHHHE NPSLENH<sup>↓</sup>RIK SFKNKGRDVE TMRRRNEVT VELRKNKDE HLLKKNV<sup>↓</sup>PQ

70 80 90 100 110 120  
 EESLEDSVD ADFKAQNV<sup>↓</sup>L EAILQ<sup>↓</sup>NATS NPVQLSAVO AARKLSSDR NPPIDDLIKS

130 140 150 160 170 180  
 GILPILVKCL ERDDNPS<sup>↓</sup>LQ EA<sup>↓</sup>AALNTIA SGTSAQIQAV VQSNVAVLFL RLLRS<sup>↓</sup>PHONV

190 200 210 220  
 CEQAVWALGN IIGDG<sup>↓</sup>PQCRD YVISLGVVKE LLSFISPSIP ITFLRN<sup>↓</sup>V

**D MAP4K5**

10 20 30 40 50 60  
 HHHHHHMSPI LGYWKIKGLV QPTRLLE<sup>↓</sup>YI EEKYEELHYE RDEGDKWRNK KPELGLFEP

70 80 90 100 110 120  
 LPPYIDGDVVK LTQSM<sup>↓</sup>AIRY IADKHNMLGK CPKERAEISM LEGAVLDIRY GVSRIAYS<sup>↓</sup>RD

130 140 150 160 170 180  
 FETLKVDFLS KLPEMLK<sup>↓</sup>MFE DRLCHKTYLN GDHVT<sup>↓</sup>HDEFM LYDALDVVLY MDPMCLDAPE

190 200 210 220 230 240  
 KLVCFKRIE AIPQIDK<sup>↓</sup>ILK SSKYIAW<sup>↓</sup>PL GWOATFGGGD HPPKMEAPLR PAADILRRNP

250 260 270 280 290 300  
 QQD<sup>↓</sup>YELVQRV GSGTYGDVYK ARNVHTGELA AVKIKLEPG DDFSLIQE<sup>↓</sup>II FMVKECKHCN

310 320 330 340 350 360  
 IVAYFGSYLS REKLWIC<sup>↓</sup>MEY CGGGS<sup>↓</sup>LQDIY HVTG<sup>↓</sup>PLSBLQ IAYVCRE<sup>↓</sup>TIQ GLAYLHTK<sup>↓</sup>KG

370 380 390 400 410 420  
 MHRDIKGANI LLTDHG<sup>↓</sup>DVKL ADFGVA<sup>↓</sup>AKIT ATIAKRK<sup>↓</sup>SFI GTPY<sup>↓</sup>WMAPEV AAVEKNGGYN

430 440 450 460 470 480  
 QLCDIWA<sup>↓</sup>VGI TAEI<sup>↓</sup>LGELQP PMFDL<sup>↓</sup>HMPRA LFLMSKSNFQ PPKLKD<sup>↓</sup>TKW SSTF<sup>↓</sup>HN<sup>↓</sup>FKI

490 500 510 520 530 540  
 ALTKNPK<sup>↓</sup>KRP TAERLL<sup>↓</sup>HTP VAQ<sup>↓</sup>PGLSRAL AVELLDK<sup>↓</sup>VNN PDNHAHYTEA DDDDFE<sup>↓</sup>FHAI

550 560 570 580 590 600  
 IRHTIRSTNR NARAERT<sup>↓</sup>ASE INF<sup>↓</sup>DKLQFEP PLR<sup>↓</sup>KETEARD EMGLSSDPNF MLQWNP<sup>↓</sup>FVDG

610 620 630 640 650 660  
 ANTGSTSKR AIPPL<sup>↓</sup>PKP RISSY<sup>↓</sup>PDFNF PDEEK<sup>↓</sup>ASTIK HCPDSESRAP QILRRQ<sup>↓</sup>SSPS

670 680 690 700 710 720  
 CGPVAETSSI GNGDGI<sup>↓</sup>SKLM SENTEG<sup>↓</sup>SAQA PQLPRK<sup>↓</sup>KDKR DFFKPA<sup>↓</sup>INGL PPTPKV<sup>↓</sup>LMGA

730 740 750 760 770 780  
 CFSKVF<sup>↓</sup>DGCP LKINCAT<sup>↓</sup>SWI HPD<sup>↓</sup>TKQYII FGTEDGI<sup>↓</sup>YTL NLNELHEATM EQLF<sup>↓</sup>PRKCTW

790 800 810 820 830 840  
 LYVINNTLMS LSEGK<sup>↓</sup>TFOLY SHNLIAL<sup>↓</sup>FEB AKKPG<sup>↓</sup>LAHI QTHR<sup>↓</sup>FDRIL PRKFAL<sup>↓</sup>TTKI

850 860 870 880 890 900  
 PDTKGCH<sup>↓</sup>KCC IVRN<sup>↓</sup>PYTGK YL<sup>↓</sup>CGALQSGI VLLQW<sup>↓</sup>YEFMQ KFMLIK<sup>↓</sup>HFD PLPS<sup>↓</sup>PLNVFE

910 920 930 940 950 960  
 MLVIPEQ<sup>↓</sup>EYP MCVCA<sup>↓</sup>ISKGT ESNQV<sup>↓</sup>QFET INLNS<sup>↓</sup>ASSWF TEIGAGS<sup>↓</sup>QL DSIV<sup>↓</sup>TQLE<sup>↓</sup>R

970 980 990 1000 1010 1020  
 DTVLVCL<sup>↓</sup>DKP VKIVN<sup>↓</sup>LQGL KSSK<sup>↓</sup>LASEL SFD<sup>↓</sup>FRIESVV CIQDS<sup>↓</sup>VLA<sup>↓</sup>FW KHGMQ<sup>↓</sup>GKSPK

1030 1040 1050 1060 1070  
 SDEVTQ<sup>↓</sup>EISD ETRV<sup>↓</sup>FRLGGS DRVV<sup>↓</sup>VLESRE TENPTA<sup>↓</sup>HSNL YILAG<sup>↓</sup>HENS<sup>↓</sup>Y

**E CREB1**

10 20 30 40 50 60  
 MHHHHHMTM ESGEANQ<sup>↓</sup>SG DA<sup>↓</sup>AVTEAENQ QMTVQAQ<sup>↓</sup>PQI ATLAQ<sup>↓</sup>VMFA AHATSSA<sup>↓</sup>PTV

70 80 90 100 110 120  
 TLVQLP<sup>↓</sup>NGQT VQVHG<sup>↓</sup>VIQAA QPSV<sup>↓</sup>IQSPQV QTVQ<sup>↓</sup>ISTIAE SEDSQ<sup>↓</sup>ESVD<sup>↓</sup> VTD<sup>↓</sup>SQ<sup>↓</sup>KRRB<sup>↓</sup>I

130 140 150 160 170 180  
 LSR<sup>↓</sup>RPSYR<sup>↓</sup>KI LNDLSS<sup>↓</sup>DAPG VPRIE<sup>↓</sup>EKSE EETSAP<sup>↓</sup>AITV VTVP<sup>↓</sup>PIYQT SSGQY<sup>↓</sup>IAITQ

190 200 210 220 230 240  
 GGAIQ<sup>↓</sup>LANN TDG<sup>↓</sup>VQGLQTL TMTNAA<sup>↓</sup>TQP GT<sup>↓</sup>TILQ<sup>↓</sup>YQT TDGQ<sup>↓</sup>ILVPS NQV<sup>↓</sup>VQ<sup>↓</sup>ASG

250 260 270 280 290 300  
 DVQTYQ<sup>↓</sup>IRTA PTSTI<sup>↓</sup>APGV MASS<sup>↓</sup>PALPTQ PAE<sup>↓</sup>EAARK<sup>↓</sup>E VRLMK<sup>↓</sup>NREAA RECR<sup>↓</sup>RK<sup>↓</sup>K<sup>↓</sup>EY

310 320 330  
 VKCLE<sup>↓</sup>NRVAV LENQ<sup>↓</sup>NK<sup>↓</sup>LIE ELK<sup>↓</sup>ALK<sup>↓</sup>DLYC HKSD

Recombinant partial RPAP1 analysed in Fig. 3B

| Bands                  | ID    | Edman sequencing | MW <sub>Theor</sub> (kDa) | MW <sub>Exp</sub> (kDa) |
|------------------------|-------|------------------|---------------------------|-------------------------|
| Intact RPAP1 (1 – 351) | RPAP1 | GSSHH            | 39.4                      | ~52.0                   |
| G1 – Q27               | -     | -                | 3.1                       | -                       |
| S28 – T360             | 1     | n/a              | 36.2                      | ~44.9                   |
| G1 – Q245              | 2     | n/a              | 26.4                      | ~33.0                   |
| S28 – Q245             | 3     | SQFLA            | 23.2                      | ~29.0                   |
| A246 – T360            | 4     | AMAPE            | 13.0                      | ~17.0                   |
| Truncated RPAP1        | 5     | GSSHH            | unknown                   | ~15.0                   |
| S28 – unknown          | 6     | SQFLA            | unknown                   | ~8.0                    |

n/a: no amino acids identified 225 [RPAP1-N]270 356 [RPAP1-C]422  
 RPAP1-like N-terminal RPAP1-like C-terminal

Recombinant PTBP1-3 analysed in Fig. 3B

| Bands                  | ID    | Edman sequencing | MW <sub>Theor</sub> (kDa) | MW <sub>Exp</sub> (kDa) |
|------------------------|-------|------------------|---------------------------|-------------------------|
| Intact PTBP1 (1 – 557) | PTBP1 | n/a              | 60.5                      | ~64.0                   |
| H1 – Q158              | -     | -                | 17.2                      | -                       |
| A159 – I563            | -     | -                | 43.3                      | -                       |
| H1 – Q327              | -     | -                | 35.1                      | -                       |
| A328 – I563            | 1     | AAGLS            | 25.3                      | ~27.0                   |
| A159 – unknown         | 2     | AVNSV            | -                         | ~24.0                   |
| A159 – Q327            | 3     | AVNSV            | 18.0                      | ~23.0                   |

n/a: no amino acids identified 11 [NLS]48 Nuclear localization signal

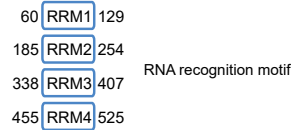

Recombinant partial IMA4 analysed in Fig. S2D

| Bands                 | ID   | Edman sequencing | MW <sub>Theor</sub> (kDa) | MW <sub>Exp</sub> (kDa) |
|-----------------------|------|------------------|---------------------------|-------------------------|
| Intact IMA4 (3 – 220) | IMA4 | GSSHH            | 25.4                      | ~29.0                   |
| N86 – V227            | 1    | n/a              | 15.3                      | ~16.0                   |
| G1 – Q85              | 2    | n/a              | 10.01                     | ~15.0                   |

n/a: no amino acids identified 11 [IBB]93 Importin beta binding domain

103 [Arm-3] 440 Armadillo repeats (1 to 8) 447 [Arm-3] 449 Atypical armadillo repeat

Recombinant MAP4K5 analysed in Fig. 4C

| Bands                   | ID     | Edman sequencing | MW <sub>Theor</sub> (kDa) | MW <sub>Exp</sub> (kDa) |
|-------------------------|--------|------------------|---------------------------|-------------------------|
| Intact MAP4K5 (1 – 846) | MAP4K5 | n/a              | 121.3                     | ~119.0                  |
| H1 – M680               | 1      | n/a              | 77.2                      | ~75.0                   |
| S681 – Y1070            | 2      | SENTE            | 44.1                      | ~43.0                   |

n/a: no amino acids identified

S – Tkc 20 [S – Tkc]277 Serine/Threonine protein kinase

CNH 511 [CNH]826 Citron homology domain

Recombinant CREB1 analysed in Fig. 4C

| Bands                  | ID    | Edman sequencing | MW <sub>Theor</sub> (kDa) | MW <sub>Exp</sub> (kDa) |
|------------------------|-------|------------------|---------------------------|-------------------------|
| Intact CREB1 (1 – 327) | CREB1 | MHHHH            | 36.1                      | ~46.0                   |
| M1 – Q216              | 1     | n/a              | 22.9                      | ~31.0                   |
| Contaminant band       | \$    | MKVAK            | unknown                   | ~25.0                   |
| Y217 – D334            | 2     | YAQTT            | 13.2                      | ~17.0                   |
| M1 – Q236              | -     | -                | 25.1                      | -                       |
| A237 – D334            | 3     | AASGD            | 11.0                      | ~16.0                   |
| Y217 – Q236            | -     | -                | 2.2                       | -                       |

n/a: no amino acids identified

113 [pKID]153 Phosphorylated kinase-inducible domain

281 [bZIP]339 Basic region leucine zipper

■ fusion tag ↓3CL<sup>P<sub>RO</sub></sup> cleavage site identified by TAILS ↓3CL<sup>P<sub>RO</sub></sup> cleavage site identified by Edman sequencing



**Figure S3 related to Figures 3, 4, and S2. Recombinant protein substrate details.**

Protein sequence and Edman sequencing of 3CL<sup>pro</sup>-cut sites in the recombinant proteins shown in Figures 3, 4 and S2. Blue, P-side. Red, P'-side (identified by TAILS). Green, P'-side (identified by Edman sequencing). Theoretical molecular weight (ProtParam, ExPASy) and experimental molecular weight (GelAnalyzer version 19.1) of intact proteins and the proteolytic fragments generated by 3CL<sup>pro</sup>. Protein domain information was accessed from Smart (<https://smart.embl.de>).

- (A) Partial recombinant RPAP1 (1 – 351 aa, BC000246).
- (B) PTBP1 (1 – 557 aa, NP\_002810.1).
- (C) Partial recombinant IMA4 (3 – 220 aa, NP\_002258.2).
- (D) MAP4K5 (1 – 846 aa, NP\_006566.2).
- (E) CREB1 (1 – 327 aa, NM\_004379).

**A** Primary human airway epithelial cells

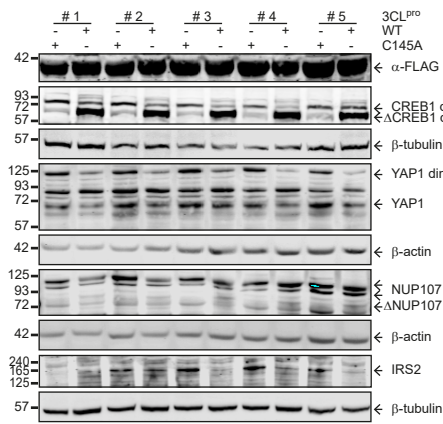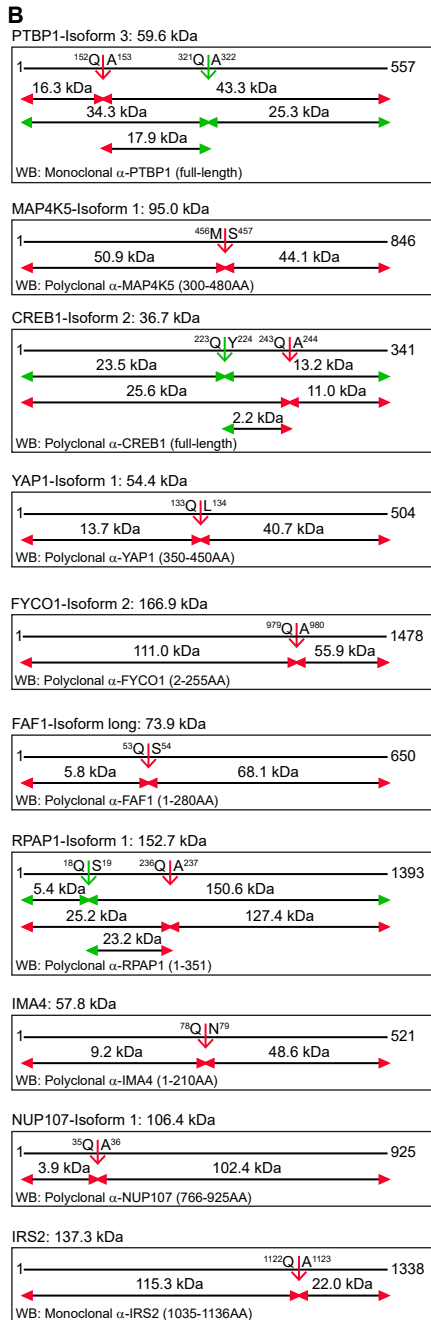

**C** SARS-CoV-2 infected Calu-3 cells

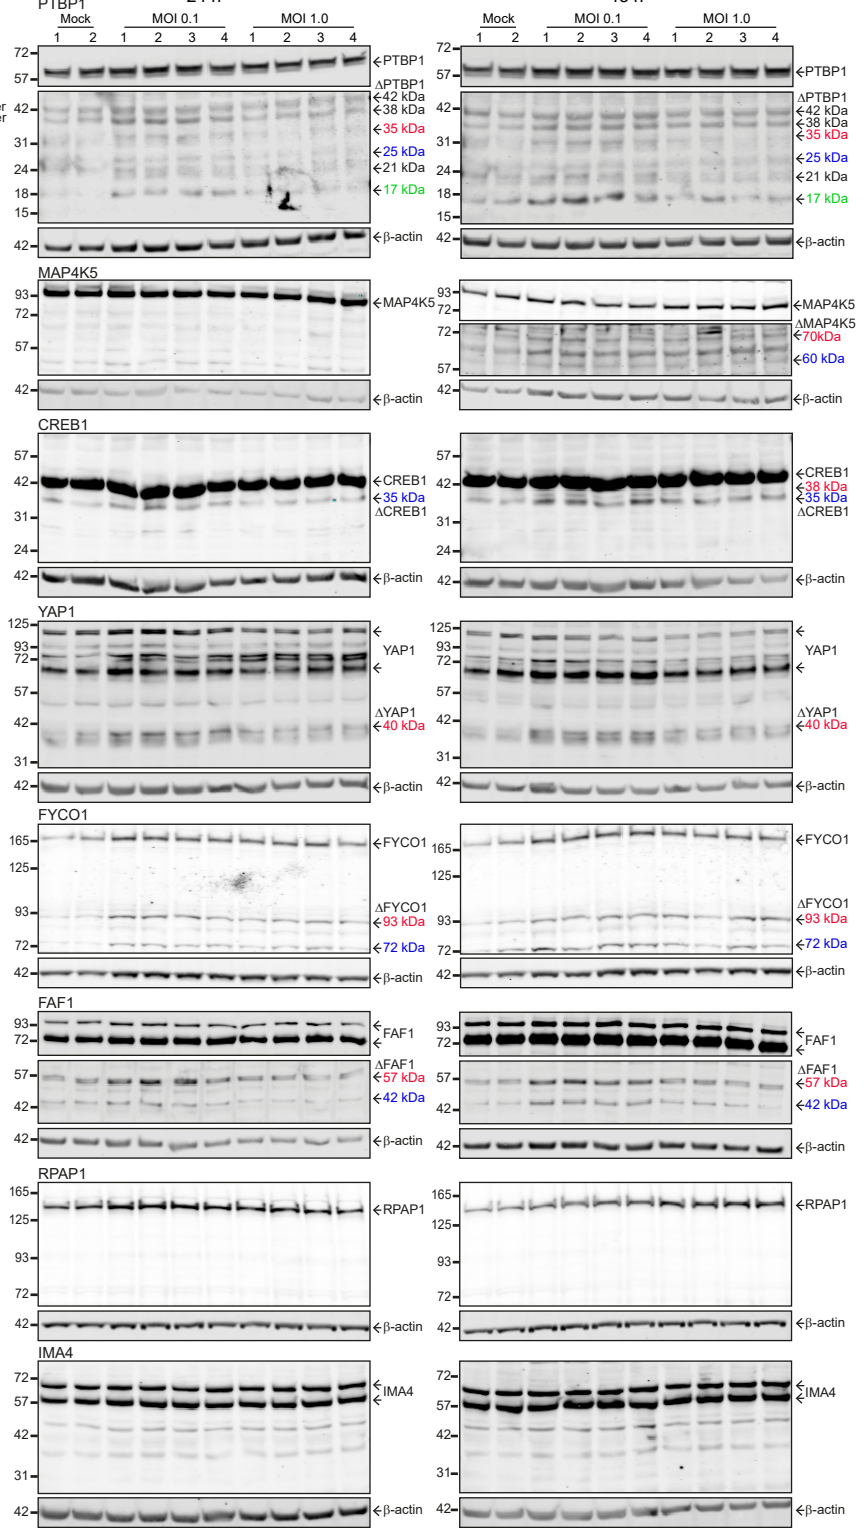

**D** SARS-CoV-2 infected Calu-3 cells

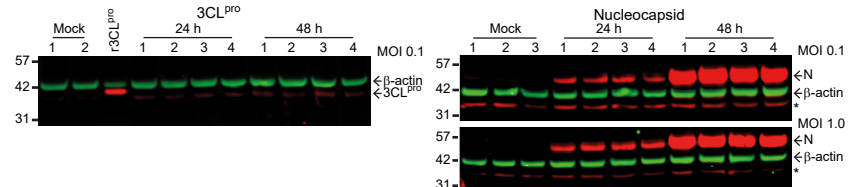

**Figure S4 related to Figures 3 and 4. 3CL<sup>pro</sup> substrates in bronchial or SARS-CoV-2 infected human lung cells.**

(A) Immunoblots for the proteins indicated of lysates from HAECs ( $N = 5$  donors) incubated with 3CL<sup>pro</sup> or 3CL<sup>pro</sup>-C145A (1:200 w/w, E:S) for 18 h, 37°C. Anti-FLAG antibody verified that equivalent amounts of 3CL<sup>pro</sup> and inactive 3CL<sup>pro</sup>-C145A were incubated.

(B) Schematics of all substrates validated in Figures 3 and 4. 3CL<sup>pro</sup> cleavage sites identified by TAILS (red arrow) and Edman sequencing (green arrow).

(C) Uncropped immunoblots of substrates in Calu-3 lung epithelial cells infected with SARS-CoV-2 for 24 and 48 h (MOI 0.1 and 1.0,  $n = 4$ ,  $n = 2$  mock). Proteolytic fragments indicated by apparent molecular weights or  $\Delta$ .

(D) Immunoblots of 3CL<sup>pro</sup> and nucleocapsid protein (N) in Calu-3 cells infected with SARS-CoV-2 at a MOI 0.1 and 1.0 for 24 ( $n = 4$ ) and 48 ( $n = 4$ ) hpi, or mock-treated ( $n = 3$ ). Positive control, recombinant (r)3CL<sup>pro</sup> in control cell lysate. b-actin and b-tubulin loading controls.

**A** SARS-CoV-2 infected Vero E6 cells

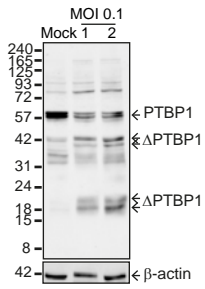

**B**

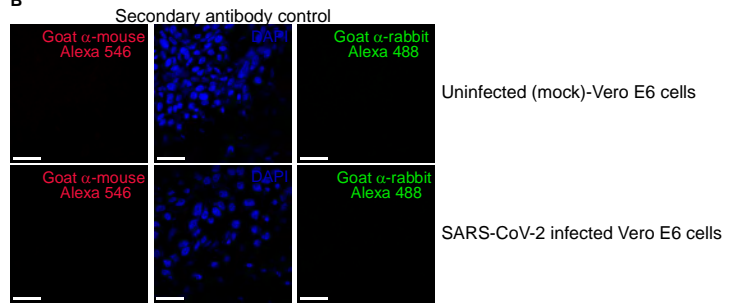

**C**  
Exp. 1

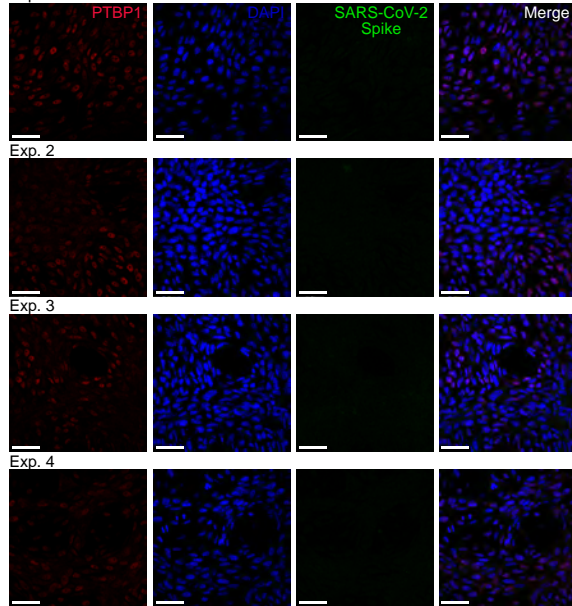

**C**  
Exp. 1

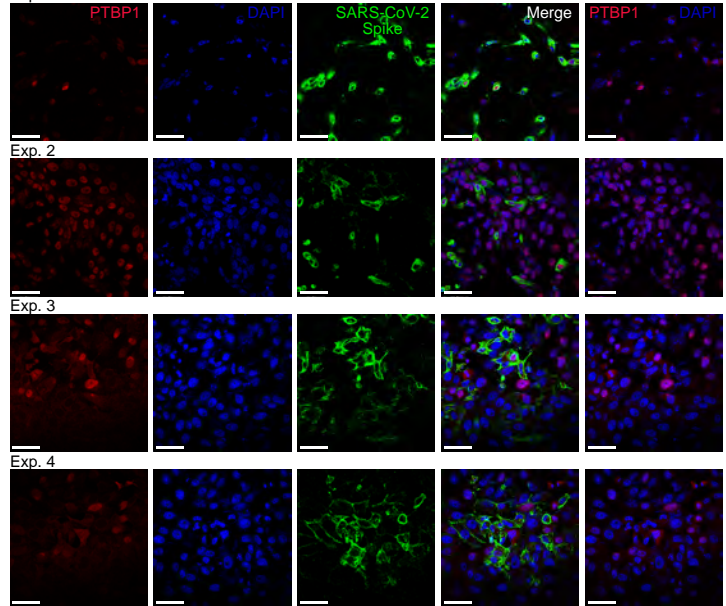

**D**

SARS-CoV-2 infected Vero E6 cells

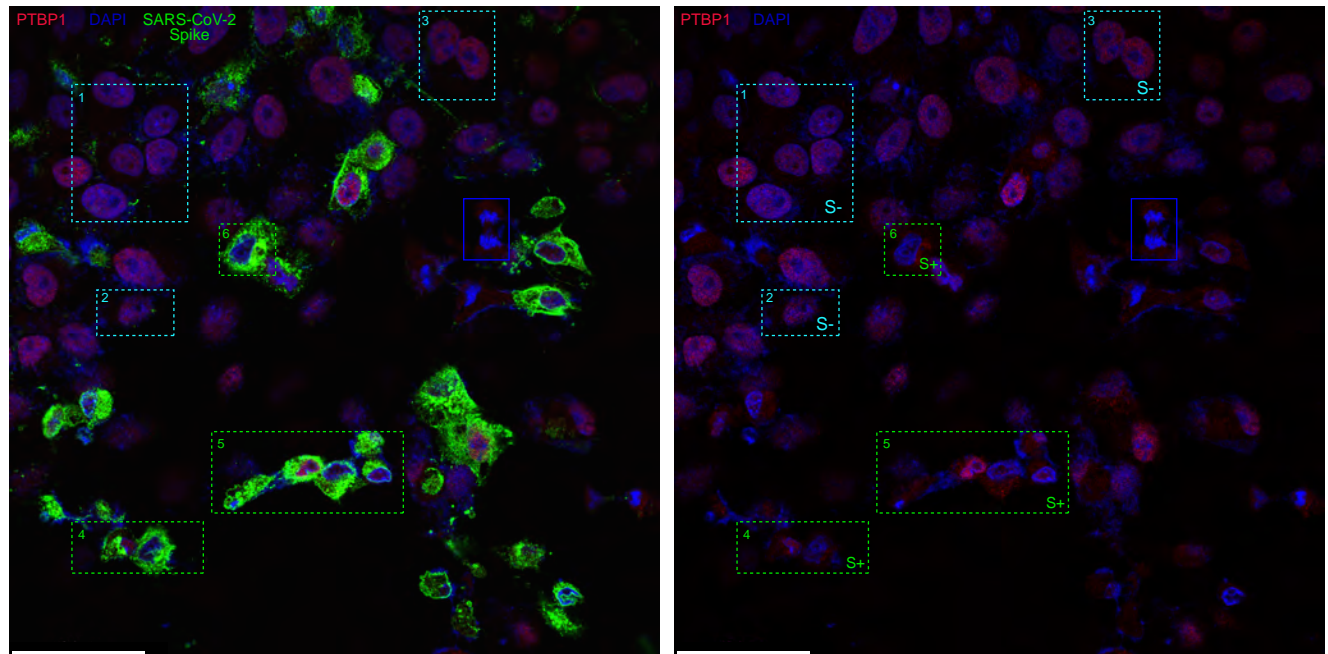

**Figure S5 related to Figure 3. Subcellular localization of PTBP1 in Vero E6 cells infected with SARS-CoV-2.**

(A) Immunoblot of PTBP1 and cleaved ( $\Delta$ ) PTBP1 in the SARS-CoV-2-infected Vero E6 cells (MOI 0.1, 48 hpi) used for subcellular localization in B–D. b-actin loading controls.

(B) Secondary antibody controls.

(C) Subcellular localization of PTBP1 in uninfected ( $N = 4$ , mock) and SARS-CoV-2-infected ( $N = 4$ ) Vero E6 cells. Confocal images of immunofluorescent localization of PTBP1 and SARS-CoV-2 Spike S1 glycoprotein. DAPI, nuclear stain. Scale bar, 50  $\mu\text{m}$ . Far-right panels, merge of PTBP1 and DAPI channels to visualize cytoplasmic *versus* nuclear PTBP1.

(D) Enlarged and uncropped confocal imaging of Figure 3G, Spike-positive (S+) and Spike-negative (S-) (scale bar, 50  $\mu\text{m}$ ). Cyan boxes, S- uninfected cells. Green boxes, S+ infected cells. Dark blue-box, cytoplasmic PTBP1 in anaphase cells.

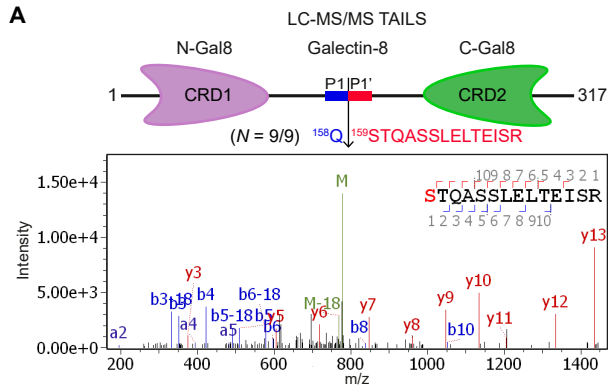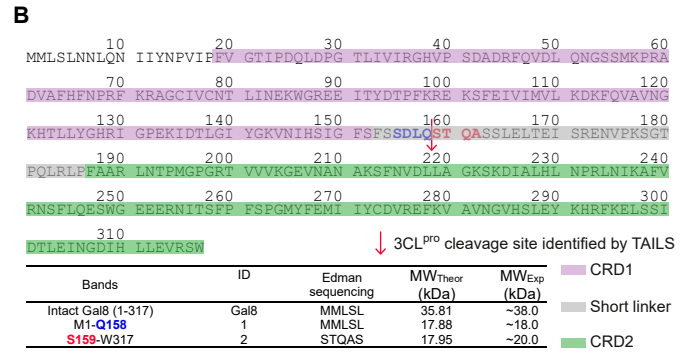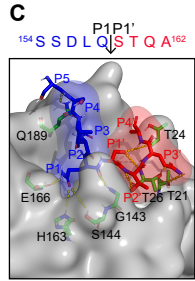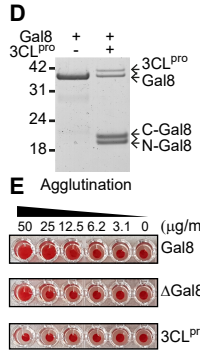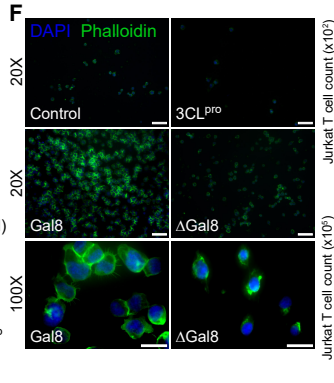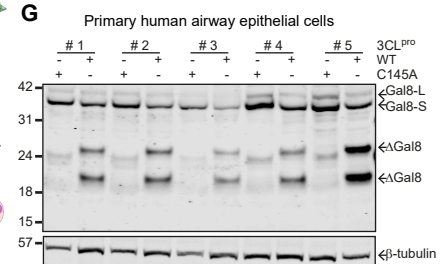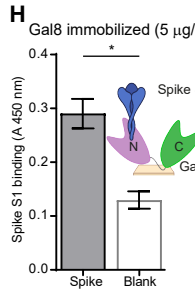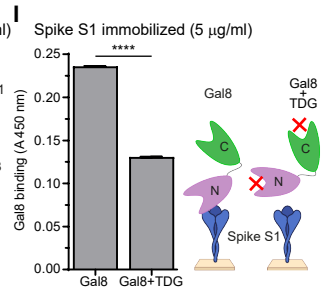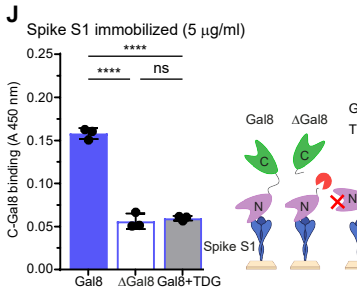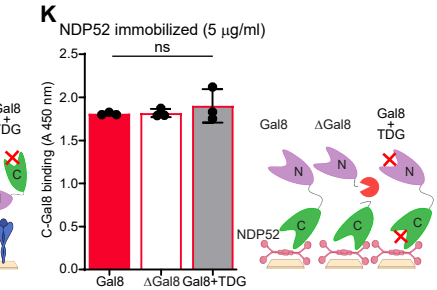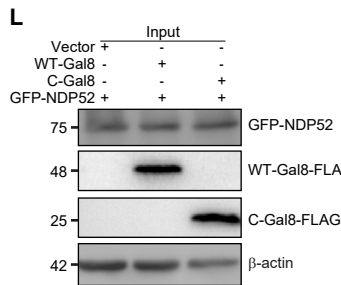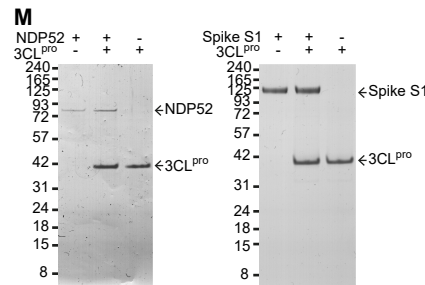

**Figure S6 related to Figure 5. Loss of galectin-8 biological function and binding to SARS-CoV-2 Spike S1 glycoprotein after cleavage by 3CL<sup>pro</sup>.**

- (A) MS/MS spectrum of TAILS neo-N-terminal peptide (red) identifying 3CL<sup>pro</sup> cleavage site in galectin-8 (Gal8) in  $N = 9/9$  BEAS-2B cell experiments.
- (B) Reference sequence of recombinant Gal8 (short linker) (1 – 317) #AAF 19370.1. Edman sequencing of 3CL<sup>pro</sup>-cleaved Gal8 in Figure 5C.
- (C) Structural model of Gal8 P5–P1 (blue sticks) and P1'–P4' (red sticks) amino acid residues interacting with the 3CL<sup>pro</sup> substrate-binding S and S'-subsites, respectively (grey surface).
- (D) Cleaved recombinant human Gal8 ( $\Delta$ Gal8) prepared for agglutination (S6E), adhesion (S6F), and binding (Figures 5G and 5J) assays.
- (E) Human erythrocyte agglutination assay with intact or  $\Delta$ Gal8, or 3CL<sup>pro</sup> (control).
- (F) Adherent *versus* non-adherent Jurkat T cells in serum-free RPMI containing intact or  $\Delta$ Gal8, or 3CL<sup>pro</sup> (control) were counted after DAPI/phalloidin staining. Scale bars, 20x: 50  $\mu$ m; 100x: 20  $\mu$ m. Mean  $\pm$  SD,  $n = 2$ , \*\*\*  $P \leq 0.001$ , \*\*  $P \leq 0.01$ , ns  $P > 0.05$ , one-way ANOVA with Tukey's multiple comparisons test.
- (G) Gal8 immunoblots of HAECs lysates from  $N = 5$  donors incubated with 3CL<sup>pro</sup> or 3CL<sup>pro</sup>-C145A (1:200 w/w, E:S) for 18 h, 37°C. b-tubulin loading control.
- (H) ELISA of SARS-CoV-2 Spike S1 glycoprotein binding to immobilized Gal8 (mean  $\pm$  SD,  $n = 2$ ,  $N = 2$ , \*  $P \leq 0.05$ , Student's t-test).
- (I) Anti-Gal8 antibody ELISA of Gal8 binding to immobilized SARS-CoV-2 Spike S1 glycoprotein in the presence of thiodigalactoside (TDG) (mean  $\pm$  SD,  $n = 2$ ,  $N = 2$ , \*\*\*\*  $P \leq 0.0001$ , Student's t-test).
- (J) Anti-C-Gal8 antibody ELISA of intact Gal8, cleaved  $\Delta$ Gal8, or intact Gal8 in the presence of TDG binding to immobilized Spike S1.
- (K) Anti-C-Gal8 antibody ELISA of intact Gal8, cleaved  $\Delta$ Gal8, or TDG-inhibited Gal8 binding to immobilized NDP52. One-way ANOVA with Tukey's multiple comparisons test (mean  $\pm$  SD,  $n = 3$ , ns  $P > 0.05$ ).
- (L) Transfected GFP-NDP52, WT-Gal8-FLAG or C-Gal8 (159-317)-FLAG 3CL<sup>pro</sup>-cleavage analogue detected in the HeLa-cell lysates before immunoprecipitation experiments shown in Figure 5H. Immunoblots were performed with specific anti-FLAG antibody, anti-NDP52 antibody, and with  $\beta$ -actin used as the loading control.
- (M) SDS-PAGE of NDP52 and SARS-CoV-2 Spike S1 incubated with recombinant 3CL<sup>pro</sup>.
